# Supplementary material for: IRAPs in Combination with Highly Informative ISSRs Confer Effective Potentials for Genetic Diversity and Fidelity Assessment in Rhododendron
Source: Preprints.org preprint supplement (doi:10.20944/preprints202303.0481.v1), 2023-03-28
Supplement: Supplementary file 1 [file Table S1_S2.xlsx]

## Sheet: S1
Table S1 Inventory of 46 rhododendrons collected in the Baili Rhododendron Reserve in Guizhou, China in this study.
Sl. No.	Rhododendron Accessions
1_2	R. irroratum
1_1
2_1	R. agastum
2_2
2_3
2_4
2_5
3_1	R. delavayi
3_2
3_3
3_4
3_5
3_6
3_7
3_8
3_9
4	R. scabrifolium
5_1	R. decorum
5_2
5_3
5_4
5_5
5_6
5_7
5_8
5_9
5_10
5_11
6_1	R. annae
6_2
6_3
7	R. stamineum
8	R. feddei
9	R. davidsonianum
10	R. rigidum
11	R. liliiflorum
12	R. denudatum
13	R. subroseuse
14	R. floribundum
15	R. pudiense
16	R. bailiense
17	R. jiulongshanense

## Sheet: S2
Table S2 Details of TY1-Copia and TY3-Gypsy retrotransposons generated by molecular cloning and IRAP primers designed from these sequences.
Retrotransposon ID	Length (bp)	GC content	IRAP Primer ID	IRAP primer sequence
Copia
TY1-3	237	0.44	LTR1-1	GTATGGTTTGAAACAGGCTCCCAG
TY1-6	237	0.45	LTR1-2	GGTTTGAAACAGGCTCCCAGA
TY1-7	234	0.46	LTR1-3	TGAAACAGGCTCCCAGACAG
TY1-9	239	0.46	LTR1-4	GGTATAGAAAGTTTGACGGTT
TY1-10	241	0.44	LTR1-5	AGTGGTACAGAAAGTTTGATG
TY1-13	235	0.47	LTR1-6	AGTTGGCTCTACATGCATCA
TY1-16	237	0.46	LTR1-7	AGTGGTACAGAAAGTTTGATG
TY1-21	235	0.45	LTR1-8	TGGGTTGAAGCAAGCTCCGAG
TY1-24	245	0.43	LTR1-9	AAGTCACTTTATGGGCTGAAA
TY1-29	236	0.5	LTR1-10	ATGGTCTTAAGCAGTCACCTC
TY1-30	241	0.42	LTR1-11	GGGCTGAAACAGTCTCCAAGA
TY1-33	236	0.47	LTR1-12	CTCCCAGACAGTGGTACAGAA
TY1-38	244	0.41	LTR1-13	GAAGAAGTCACTTTATGGGCT
TY1-40	236	0.47	LTR1-14	CCCAGACAGTGGTACAGAAAG
TY1-42	240	0.42	LTR1-15	GACAATGGTACAAGAGGTTTG
TY1-45	234	0.44	LTR1-16	ACAGGCTCCCAGACAGTGGTA
TY1-46	236	0.45	LTR1-17	GAGTCTGTATGGTTTGAAACA
TY1-47	237	0.46	LTR1-18	TTTGAAACAGGCTCCCAGACA
TY1-54	236	0.44	LTR1-19	TCTGTATGGTTTGAAACAGGC
TY1-58	237	0.46	LTR1-20	AGGTGTGAATCTACTGAAGCA
TY1-59	240	0.45	LTR1-21	TGGTTTGAAACAGGCTCCCAG
TY1-60	238	0.44	LTR1-22	AGACAGTGGTACAGAAAGTTT
TY1-61	239	0.41	LTR1-23	CAGTCTCCAAGACAATGGTAC
Mean	237.826	0.447826
Gypsy
TY3-2	359	0.48	LTR3-1	ACTATGTAAGGGAAGAGGGAG
TY3-3	326	0.44	LTR3-2	GAGGAGCATCTCAGGATTGTA
TY3-6	362	0.4	LTR3-4	TAAAACAGACTTTGCACTTGC
TY3-10	394	0.43	LTR3-5	CGTTTATACGCCAAGCTTAGT
TY3-11	362	0.42	LTR3-6	TTACCATCGTTCTTGAACTCT
TY3-14	350	0.45	LTR3-7	ATTTGTCCCATCTTAGAGACG
TY3-21	344	0.39	LTR3-10	AACAACATTTGCTGCATTTAA
TY3-23	327	0.43	LTR3-11	CGTGCTAGCCTGTTTACTTTA
TY3-27	364	0.42	LTR3-12	GCCATTGTCCTTGAACTCTTT
TY3-32	355	0.47	LTR3-14	GATAACCTGGTCCAGGCCTT
TY3-36	346	0.48	LTR3-15	GACCACCTCGATGACTTTCGA
TY3-39	347	0.48	LTR3-17	AACATTTGGATAACCTGGGCC
TY3-42	366	0.43	LTR3-18	CCGATTGTACGCCAAACTTA
TY3-46	340	0.42	LTR3-19	AACAGGATACCCTTTTGAAGT
TY3-47	330	0.39	LTR3-20	TTGCTTAATTGTGTGTTCGGG
TY3-48	366	0.47	LTR3-21	GTACAGGCTCCGTCTAAACGC
Mean	352.375	0.4375
